# Supplementary material for: Pharmacokinetics of Cromolyn and Ibuprofen in Healthy Elderly Volunteers
Source: PubMed Central journal article supplement — Clin Drug Investig. 2017 Aug 30;37(11):1025–34. doi: 10.1007/s40261-017-0549-5 (PMC5643367; doi:10.1007/s40261-017-0549-5), 2017-08-30
Supplement: 40261_2017_549_MOESM1_ESM.pdf [file 40261_2017_549_MOESM1_ESM.pdf]

## **The Pharmacokinetics of Cromolyn and Ibuprofen in Healthy Elderly Volunteers**

David Brazier<sup>1</sup>, Robert Perry<sup>2</sup>, Jim Keane<sup>1</sup>, Katie Barrett<sup>1</sup>, and David R. Elmaleh<sup>1</sup>

1. AZTherapies, Inc., Boston, MA USA

2. Panax Clinical Research, Miami Lakes, FL USA

### **Supplemental Material**

Supplemental Table 1. Pharmacokinetic Analytical Methods

Supplemental Table 2. Cromolyn Plasma Concentrations

Supplemental Table 3. Ibuprofen Plasma Concentrations

Supplemental Table 4. Cromolyn CSF Concentrations

Supplemental Table 5. Ibuprofen CSF Concentrations

**Supplemental Table 1. Pharmacokinetic Analytical Methods**

| Assay               | Sample Preparation                                                                                                                                       | Methods                                                                                                | Linearity                                                                                         | Precision (% CV)                                                                                                      | Accuracy (% Bias)                                                                                                          | Stability                                                                                              |
|---------------------|----------------------------------------------------------------------------------------------------------------------------------------------------------|--------------------------------------------------------------------------------------------------------|---------------------------------------------------------------------------------------------------|-----------------------------------------------------------------------------------------------------------------------|----------------------------------------------------------------------------------------------------------------------------|--------------------------------------------------------------------------------------------------------|
| Cromolyn<br>CSF     | Cromolyn and the internal standard, cromolyn-d <sub>5</sub> , were released from the human CSF by dilution.                                              | LC-MS/MS<br>Reversed phase HPLC<br>C8 analytical column<br>Applied Biosystems API5000 or API5500       | Bias at LLOQ: 0.7%<br>Bias above LLOQ: -1.2 to 1.1%<br>Bioanalytical range: 0.100 to 10.0 ng/mL   | Intra-assay: 6.8 to 7.3% (LLOQ)<br>1.0 to 7.4% (above LLOQ)<br>Inter-assay: 6.7% (LLOQ)<br>2.9 to 6.3% (above LLOQ)   | Intra-assay: -4.0 to -2.2% (LLOQ)<br>0.1 to 7.8% (above LLOQ)<br>Inter-assay: -2.8% (LLOQ)<br>2.7 to 5.0% (above LLOQ)     | Stable for 4 freeze/thaw cycles<br>Stable at RT for 7.75 hours<br>Stable for 141 days at -70°C         |
| Cromolyn<br>Plasma  | Cromolyn and the internal standard, cromolyn-d <sub>5</sub> , were released from the human plasma containing K2-EDTA by protein precipitation.           | LC-MS/MS<br>Reversed phase HPLC<br>Diphenyl analytical column<br>Applied Biosystems API5000 or API5500 | Bias at LLOQ: 2.2%<br>Bias above LLOQ: -4.2 to 4.0%<br>Bioanalytical range: 10.0 to 2,000.0 ng/mL | Intra-assay: 3.5 to 6.8% (LLOQ)<br>2.5 to 5.7% (above LLOQ)<br>Inter-assay: 5.2% (LLOQ)<br>3.3 to 4.1% (above LLOQ)   | Intra-assay: -1.4 to 0.2% (LLOQ)<br>-2.3 to 3.6% (above LLOQ)<br>Inter-assay: -0.7% (LLOQ)<br>-1.5 to 1.4% (above LLOQ)    | Stable for 4 freeze/thaw cycles<br>Stable at RT for 7.5 hours<br>Stable for 187 days at -70°C          |
| Ibuprofen<br>CSF    | Ibuprofen and the internal standard, ibuprofen-d <sub>3</sub> , were extracted from human CSF using derivatization followed by liquid-liquid extraction. | LC-MS/MS<br>Reversed phase HPLC<br>C8 analytical column<br>Applied Biosystems API4000                  | Bias at LLOQ: -0.5%<br>Bias above LLOQ: -2.0 to 1.6%<br>Bioanalytical range: 0.300 to 75.0 ng/mL  | Intra-assay: 2.3 to 5.9% (LLOQ)<br>1.0 to 4.9% (above LLOQ)<br>Inter-assay: 6.8% (LLOQ);<br>2.8 to 3.8% (above LLOQ)  | Intra-assay: -12.4 to -0.4% (LLOQ)<br>-7.4 to 3.3% (above LLOQ)<br>Inter-assay: -5.4% (LLOQ)<br>-5.8 to -0.6% (above LLOQ) | Stable for 4 freeze/thaw cycles<br>Stable at RT for 7.25 hours<br>Stable for 120 days at -70°C         |
| Ibuprofen<br>Plasma | Ibuprofen and the internal standard, ibuprofen-d <sub>3</sub> , were released from the human plasma containing K2-EDTA by protein precipitation.         | LC-MS/MS<br>Reversed phase HPLC<br>C18 analytical column<br>Applied Biosystems API3000 or API4000      | Bias at LLOQ: 0.2%<br>Bias above LLOQ: -5.3 to 4.2%<br>Bioanalytical range: 25.0 to 12,500 ng/mL  | Intra-assay: 9.7 to 12.4% (LLOQ)<br>2.7 to 6.5% (above LLOQ)<br>Inter-assay: 17.6% (LLOQ)<br>3.6 to 6.3% (above LLOQ) | Intra-assay: -17.6 to 16.2% (LLOQ)<br>-2.8 to 9.5% (above LLOQ)<br>Inter-assay: -0.2% (LLOQ)<br>-1.4 to 5.4% (above LLOQ)  | Stable for at least 4 freeze/thaw cycles<br>Stable at RT for 8.0 hours<br>Stable for 196 days at -70°C |

CSF cerebral spinal fluid; CV coefficient of variation; HPLC high performance liquid chromatography; EDTA ethylenediaminetetraacetic acid; LC-MS/MS liquid chromatography-tandem mass spectroscopy; LLOQ lower limit of quantification; RT room temperature

**Supplemental Table 2. Cromolyn Plasma Concentrations**

| <b>Condition / Parameter</b>    | <b>0 Minutes</b> | <b>5 Minutes</b> | <b>10 Minutes</b> | <b>15 Minutes</b> | <b>30 Minutes</b> | <b>1 Hour</b>  | <b>2 Hours</b> | <b>4 Hours</b> | <b>6 Hours</b> |
|---------------------------------|------------------|------------------|-------------------|-------------------|-------------------|----------------|----------------|----------------|----------------|
| <b>Single Dose (17.1 mg), n</b> | 25               | 25               | 25                | 25                | 25                | 25             | 23             | 9              | 0              |
| Mean (SD)                       | 0.00 (0.000)     | 35.92 (32.492)   | 40.53 (32.420)    | 38.66 (27.396)    | 40.29 (28.928)    | 30.29 (15.962) | 20.36 (10.558) | 14.14 (4.384)  |                |
| %CV                             |                  | 90.45            | 79.99             | 70.86             | 71.80             | 52.70          | 51.86          | 31.00          |                |
| Median                          | 0.00             | 26.90            | 32.70             | 35.00             | 29.50             | 25.30          | 17.20          | 12.10          |                |
| Range                           | 0 - 0            | 0 - 130          | 0 - 133           | 0 - 108           | 14 - 117          | 13 - 81        | 10 - 54        | 10 - 22        |                |
| <b>Double Dose (34.2 mg), n</b> | 24               | 24               | 24                | 24                | 24                | 24             | 24             | 19             | 10             |
| Mean (SD)                       | 0.00 (0.000)     | 73.57 (44.629)   | 87.32 (46.475)    | 88.18 (44.424)    | 77.75 (37.071)    | 67.07 (27.571) | 40.53 (17.949) | 21.88 (6.996)  | 14.93 (3.328)  |
| %CV                             |                  | 60.66            | 53.22             | 50.38             | 47.68             | 41.11          | 44.28          | 31.97          | 22.29          |
| Median                          | 0.00             | 66.15            | 73.80             | 74.60             | 64.50             | 58.35          | 36.40          | 19.10          | 14.30          |
| Range                           | 0 - 0            | 15 - 213         | 30 - 236          | 34 - 223          | 35 - 172          | 33 - 122       | 18 - 88        | 13 - 36        | 10 - 19        |

*BLLOQ* below lower limit of quantification, *max* maximum, *min* minimum, *SD* standard deviation, *%CV* coefficient of variation ( $100 \times SD / \text{Mean}$ ). Values reported in ng/mL. For concentrations, all BLLOQ values occurring prior to  $C_{\max}$  were replaced by '0', except for embedded BLLOQ values (between two measurable data points) which are treated as missing. Post- $C_{\max}$  BLLOQ values were treated as missing.

**Supplemental Table 3. Ibuprofen Plasma Concentrations**

| Condition / Parameter         | 0 Minutes     | 5 Minutes     | 10 Minutes     | 15 Minutes       | 30 Minutes       | 1 Hour            | 2 Hours           | 4 Hours          | 6 Hours          |
|-------------------------------|---------------|---------------|----------------|------------------|------------------|-------------------|-------------------|------------------|------------------|
| <b>Single Dose (10 mg), n</b> | 24            | 24            | 24             | 23               | 23               | 23                | 23                | 23               | 23               |
| Mean (SD)                     | 3.14 (10.656) | 7.06 (14.425) | 44.09 (73.112) | 189.61 (354.397) | 389.52 (596.162) | 655.22 (502.392)  | 670.83 (431.803)  | 368.57 (311.202) | 202.17 (107.142) |
| %CV                           | 339.17        | 204.37        | 165.82         | 186.91           | 153.05           | 76.68             | 64.37             | 84.44            | 53.00            |
| Median                        | 0.00          | 0.00          | 0.00           | 0.00             | 79.10            | 542.00            | 693.00            | 313.00           | 187.00           |
| Range                         | 0 - 39        | 0 - 43        | 0 - 234        | 0 - 1340         | 0 - 1780         | 0 - 1270          | 0 - 1970          | 0 - 1610         | 0 - 460          |
| <b>Double Dose (20 mg), n</b> | 24            | 23            | 24             | 24               | 24               | 24                | 24                | 24               | 24               |
| Mean (SD)                     | 5.70 (21.423) | 9.19 (30.977) | 19.41 (37.469) | 182.49 (449.690) | 716.72 (836.638) | 1362.71 (952.757) | 1442.50 (667.287) | 774.21 (470.139) | 486.17 (333.593) |
| %CV                           | 375.56        | 337.02        | 193.01         | 246.42           | 116.73           | 69.92             | 46.26             | 60.73            | 68.62            |
| Median                        | 0.00          | 0.00          | 0.00           | 53.70            | 346.50           | 1355.00           | 1385.00           | 655.00           | 412.50           |
| Range                         | 0 - 100       | 0 - 144       | 0 - 154        | 0 - 2220         | 0 - 3220         | 0 - 3400          | 0 - 2870          | 386 - 2740       | 181 - 1800       |

*BLLOQ* below lower limit of quantification, *max* maximum, *min* minimum, *SD* standard deviation, *%CV* coefficient of variation ( $100 \times SD / \text{Mean}$ ). Values reported in ng/mL. For concentrations, all *BLLOQ* values occurring prior to  $C_{\text{max}}$  are replaced by '0', except for embedded *BLLOQ* values (between two measurable data points) which are treated as missing. Post- $C_{\text{max}}$  *BLLOQ* values are treated as missing.

**Supplemental Table 4. Cromolyn CSF Concentrations**

| <b>Condition / Parameter</b>    | <b>0 Minutes</b> | <b>5 Minutes</b> | <b>30 Minutes</b> | <b>2 Hours</b> | <b>4 Hours</b> |
|---------------------------------|------------------|------------------|-------------------|----------------|----------------|
| <b>Single Dose (17.1 mg), n</b> | 6                | 6                | 6                 | 6              | 6              |
| Mean (SD)                       | 0.00 (0.000)     | 0.00 (0.000)     | 0.00 (0.000)      | 0.16 (0.069)   | 0.23 (0.077)   |
| %CV                             |                  |                  |                   | 43.47          | 33.25          |
| Median                          | 0.00             | 0.00             | 0.00              | 0.13           | 0.22           |
| Range                           | 0.0 - 0.0        | 0.0 - 0.0        | 0.0 - 0.0         | 0.1 - 0.3      | 0.1 - 0.4      |
| <b>Double Dose (34.2 mg), n</b> | 7                | 7                | 6                 | 7              | 7              |
| Mean (SD)                       | 0.00 (0.000)     | 0.13 (0.218)     | 0.05 (0.111)      | 0.28 (0.189)   | 0.31 (0.137)   |
| %CV                             |                  | 171.77           | 244.95            | 67.48          | 44.24          |
| Median                          | 0.00             | 0.00             | 0.00              | 0.19           | 0.33           |
| Range                           | 0.0 - 0.0        | 0.0 - 0.5        | 0.0 - 0.3         | 0.1 - 0.6      | 0.2 - 0.5      |

*BLLOQ* below lower limit of quantification, *max* maximum, *min* minimum, *SD* standard deviation, *%CV* coefficient of variation ( $100 \times SD / \text{Mean}$ ). Values reported in ng/mL. For concentrations, all BLLOQ values occurring prior to  $C_{\text{max}}$  are replaced by '0', except for embedded BLLOQ values (between two measurable data points) which are treated as missing. Post- $C_{\text{max}}$  BLLOQ values are treated as missing

**Supplemental Table 5. Ibuprofen CSF Concentrations**

| <b>Condition / Parameter</b>  | <b>0 Minutes</b> | <b>5 Minutes</b> | <b>30 Minutes</b> | <b>2 Hours</b> | <b>4 Hours</b> |
|-------------------------------|------------------|------------------|-------------------|----------------|----------------|
| <b>Single Dose (10 mg), n</b> | 6                | 6                | 6                 | 6              | 6              |
| Mean (SD)                     | 0.00 (0.000)     | 0.10 (0.247)     | 0.18 (0.308)      | 2.61 (2.272)   | 2.15 (1.762)   |
| %CV                           |                  | 244.95           | 166.78            | 87.15          | 81.84          |
| Median                        | 0.00             | 0.00             | 0.00              | 2.91           | 2.70           |
| Range                         | 0.0 - 0.0        | 0.0 - 0.6        | 0.0 - 0.7         | 0.0 - 5.2      | 0.0 - 4.0      |
| <b>Double Dose (20 mg), n</b> | 7                | 7                | 6                 | 7              | 7              |
| Mean (SD)                     | 0.00 (0.000)     | 0.00 (0.000)     | 0.27 (0.356)      | 6.70 (4.676)   | 8.22 (3.064)   |
| %CV                           |                  |                  | 129.68            | 69.74          | 37.25          |
| Median                        | 0.00             | 0.00             | 0.17              | 5.48           | 8.05           |
| Range                         | 0.0 - 0.0        | 0.0 - 0.0        | 0.0 - 0.9         | 0.0 - 15.0     | 4.7 - 13.5     |

*BLLOQ* below lower limit of quantification, *max* maximum, *min* minimum, *SD* standard deviation, *%CV* coefficient of variation ( $100 \times SD / \text{Mean}$ ). Values reported in ng/mL. For concentrations, all BLLOQ values occurring prior to  $C_{\text{max}}$  are replaced by '0', except for embedded BLLOQ values (between two measurable data points) which are treated as missing. Post- $C_{\text{max}}$  BLLOQ values are treated as missing.
